# Supplementary material for: Follow-Up Survey of the Impact of COVID-19 on People Living with HIV during the Second Semester of the Pandemic
Source: MDPI journal article supplement (doi:10.3390/ijerph18094635), 2021-04-27
Supplement: s1 [file s1]

## SUPPLEMENTARY S2

**Country of residence of participants, country classification, and number of respondent per country**

| Country      | Geographical location <sup>a</sup> | Classification <sup>b</sup> | Number of respondents | Percentage of study population |
|--------------|------------------------------------|-----------------------------|-----------------------|--------------------------------|
| Algeria      | Africa                             | LMIC                        | 1                     | 0.4%                           |
| Argentina    | Latin America                      | LMIC                        | 1                     | 0.4%                           |
| Belarus      | Eastern Europe                     | LMIC                        | 2                     | 0.8%                           |
| Belgium      | Western Europe                     | HIC                         | 82                    | 33.2%                          |
| Bermuda      | North America                      | LMIC                        | 1                     | 0.4%                           |
| Brazil       | Latin America                      | LMIC                        | 83                    | 33.6%                          |
| Colombia     | Latin America                      | LMIC                        | 1                     | 0.4%                           |
| France       | Western Europe                     | HIC                         | 14                    | 5.7%                           |
| Georgia      | Eastern Europe                     | LMIC                        | 2                     | 0.8%                           |
| Germany      | Western Europe                     | HIC                         | 1                     | 0.4%                           |
| Greece       | Western Europe                     | HIC                         | 1                     | 0.4%                           |
| Ireland      | Western Europe                     | HIC                         | 1                     | 0.4%                           |
| Italy        | Western Europe                     | HIC                         | 2                     | 0.8%                           |
| Kazakhstan   | Asia                               | LMIC                        | 2                     | 0.8%                           |
| Luxembourg   | Western Europe                     | HIC                         | 2                     | 0.8%                           |
| Moldovia     | Eastern Europe                     | LMIC                        | 2                     | 0.8%                           |
| Netherlands  | Western Europe                     | HIC                         | 3                     | 1.2%                           |
| Portugal     | Western Europe                     | HIC                         | 1                     | 0.4%                           |
| Romania      | Eastern Europe                     | LMIC                        | 3                     | 1.2%                           |
| Russia       | Eastern Europe                     | LMIC                        | 28                    | 11.3%                          |
| South Africa | Africa                             | LMIC                        | 1                     | 0.4%                           |
| Spain        | Western Europe                     | HIC                         | 4                     | 1.6%                           |
| Switzerland  | Western Europe                     | HIC                         | 1                     | 0.4%                           |
| Turkey       | Western Europe                     | LMIC                        | 1                     | 0.4%                           |
| UK           | Western Europe                     | HIC                         | 3                     | 1.2%                           |
| Ukraine      | Eastern Europe                     | LMIC                        | 4                     | 1.6%                           |

*a. United Nations DGACM. <https://www.un.org/depts/DGACM/RegionalGroups.shtml>*

*b. World Bank Country and Lending Groups – World Bank Data Help Desk.*

<https://datahelpdesk.worldbank.org/knowledgebase/articles/906519-world-bank-country-and-lending-groups>
