# Supplementary material for: Follow-Up Survey of the Impact of COVID-19 on People Living with HIV during the Second Semester of the Pandemic
Source: MDPI journal article supplement (doi:10.3390/ijerph18094635), 2021-04-27
Supplement: s1 [file s1]

## Supplementary S3

### Comparison of respondents from the four most represented countries, $n = 207$

| Characteristics                                                                                             | Belgium<br>$n = 82$ | Brazil<br>$n = 83$ | France<br>$n = 14$ | Russia<br>$n = 28$ | $p$ -value |
|-------------------------------------------------------------------------------------------------------------|---------------------|--------------------|--------------------|--------------------|------------|
| Age, years: mean (SD)                                                                                       | 50.8 (11.5)         | 37.9 (11.8)        | 53.9 (12.3)        | 37.7 (8.3)         | < 0.001    |
| <b>Sex: <math>n</math> (%)</b>                                                                              |                     |                    |                    |                    |            |
| Male                                                                                                        | 67 (81.7%)          | 61 (73.5%)         | 13 (92.9%)         | 12 (42.9%)         | < 0.001    |
| Female                                                                                                      | 14 (17.1%)          | 20 (24.1%)         | 1 (7.1%)           | 16 (57.1%)         |            |
| Other                                                                                                       | 1 (1.2%)            | 2 (2.4%)           | 0 (0%)             | 0 (0%)             |            |
| <b>Country classification based on World Bank</b>                                                           | HIC                 | LMIC               | HIC                | LMIC               | NA         |
| <b>Highest education level: <math>n</math> (%)</b>                                                          |                     |                    |                    |                    |            |
| Primary                                                                                                     | 2 (2.4%)            | 2 (2.4%)           | 0 (0%)             | 12 (42.9%)         | NA         |
| Secondary                                                                                                   | 39 (47.6%)          | 16 (19.3%)         | 4 (28.6%)          | 8 (28.6%)          |            |
| Undergraduate                                                                                               | 25 (30.5%)          | 27 (32.5%)         | 7 (50.0%)          | 2 (7.1%)           |            |
| Post-graduate                                                                                               | 16 (19.5%)          | 38 (45.8%)         | 3 (21.4%)          | 6 (21.4%)          |            |
| <b>Religion: <math>n</math> (%)</b>                                                                         |                     |                    |                    |                    |            |
| Christian                                                                                                   | 40 (48.8%)          | 44 (53.0%)         | 2 (14.3%)          | 16 (57.1%)         | NA         |
| Muslim                                                                                                      | 1 (1.2%)            | 1 (1.2%)           | 0 (0%)             | 3 (10.7%)          |            |
| Other                                                                                                       | 2 (2.4%)            | 22 (26.5%)         | 1 (7.1%)           | 4 (14.3%)          |            |
| None                                                                                                        | 39 (47.6%)          | 16 (19.3%)         | 11 (78.6%)         | 5 (17.9%)          |            |
| <b>Marital status: <math>n</math> (%)</b>                                                                   |                     |                    |                    |                    |            |
| Single                                                                                                      | 34 (41.5%)          | 50 (60.2%)         | 6 (42.9%)          | 5 (17.9%)          | NA         |
| Stable relationship                                                                                         | 13 (15.9%)          | 11 (13.3%)         | 3 (21.4%)          | 1 (3.6%)           |            |
| Cohabitation                                                                                                | 9 (11.0%)           | 10 (12.0%)         | 2 (14.3%)          | 6 (21.4%)          |            |
| Married                                                                                                     | 10 (12.2%)          | 8 (9.6%)           | 3 (21.4%)          | 10 (35.7%)         |            |
| Divorced                                                                                                    | 13 (15.9%)          | 4 (4.8%)           | 0 (0%)             | 2 (7.1%)           |            |
| Other                                                                                                       | 3 (3.7%)            | 0 (0%)             | 0 (0%)             | 4 (7.3)            |            |
| Visited health facility or HIV clinic during the last month for routine HIV follow-up: $n$ (%)              | 49 (59.8%)          | 39 (47.0%)         | 8 (57.1%)          | 17 (60.7%)         | 0.351      |
| Received flu vaccination during the past 12 months: $n$ (%)                                                 | 70 (85.4%)          | 72 (86.7%)         | 11 (78.6%)         | 4 (14.3%)          | < 0.001    |
| <b>COVID-19 test results: <math>n</math> (%)</b>                                                            |                     |                    |                    |                    |            |
| Positive                                                                                                    | 2/19 (10.5%)        | 5/14 (35.7%)       | 2/9 (22.2%)        | 0/8 (0%)           | 0.220      |
| Negative                                                                                                    | 17/19 (89.5%)       | 9/14 (64.3%)       | 7/9 (77.8%)        | 8/8 (100%)         |            |
| <b>Willing to take COVID-19 vaccine: <math>n</math> (%)</b>                                                 |                     |                    |                    |                    |            |
| Yes                                                                                                         | 55 (67.1%)          | 81 (97.6%)         | 12 (85.7%)         | 9 (32.1%)          | NA         |
| No                                                                                                          | 5 (6.1%)            | 0 (0%)             | 0 (0%)             | 13 (46.4%)         |            |
| Don't know                                                                                                  | 22 (26.8%)          | 2 (2.4%)           | 2 (14.3%)          | 6 (21.4%)          |            |
| Depression, PHQ-2 score $\geq 3$ : $n$ (%)                                                                  | 16 (19.5%)          | 34 (41.0%)         | 1 (7.1%)           | 7 (25.0%)          | 0.005      |
| Anxiety, GAD-2 score $\geq 3$ : $n$ (%)                                                                     | 14 (17.1%)          | 33 (39.8%)         | 2 (14.3%)          | 9 (32.1%)          | 0.007      |
| <i>HIC: High income country</i><br><i>LMIC: Low- and Middle-income country</i><br><i>NA: Not applicable</i> |                     |                    |                    |                    |            |
